# Supplementary material
Source: MDPI journal article supplement (https://www.mdpi.com/2227-9040/11/1/62)
Supplement: s1 [file s1]

# **Ratiometric fluorescence probe based on deep-red emissive CdTe quantum dots and Eu<sup>3+</sup> hybrid for oxytetracycline detection**

Siyi Tan <sup>1,†</sup>, Qin Wang <sup>2,†</sup>, Qiuxia Tan <sup>2</sup>, Shaojing Zhao <sup>2</sup>, Lei Huang <sup>3,\*</sup>, Benhua Wang <sup>2</sup>, Xiangzhi Song <sup>2</sup> and Minhuan Lan <sup>2,\*</sup>

<sup>1</sup> Surgical Department of Medical Laboratory, Higentec Co., Ltd., 618 Heping Road, Changsha 410125, China; siyi.tan@higentec.com

<sup>2</sup> Hunan Provincial Key Laboratory of Micro & Nano Materials Interface Science, College of Chemistry and Chemical Engineering, Central South University, Changsha 410083, China; 212311044@csu.edu.cn (Q.W.); 212311037@csu.edu.cn (Q.T.); 31180030@csu.edu.cn (S.Z.); benhuawang@csu.edu.cn (B.W.); xzsong@csu.edu.cn (X.S.)

<sup>3</sup> Hunan Prevention and Treatment Institute for Occupational Diseases, 612 New West Road, Changsha 410007, China

\* Correspondence: drleihuang@163.com (L.H.); minhuanlan@csu.edu.cn (M.L.)

† The authors contributed equally to this work.

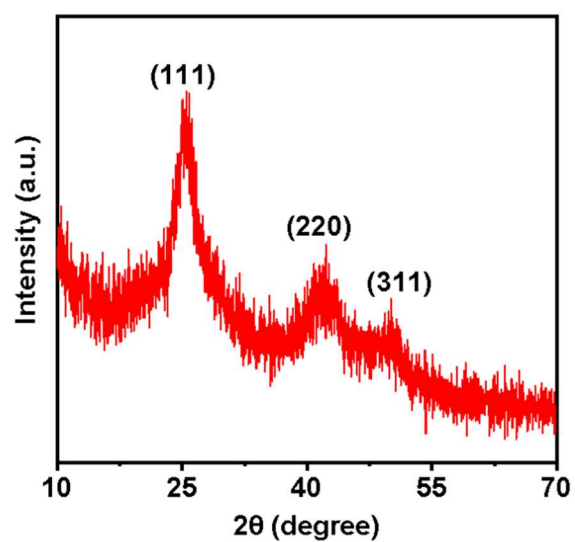

Figure S1. The XRD pattern of CdTe QDs.

Table S1. The zeta potential of CdTe QDs, CdTe QDs-Eu<sup>3+</sup> and CdTe QDs-Eu<sup>3+</sup>-OTC.

|         | CdTe QDs | Cd Te QDs-Eu <sup>3+</sup> | Cd Te QDs-Eu <sup>3+</sup> -OTC |
|---------|----------|----------------------------|---------------------------------|
| 1       | -15.3    | 30.3                       | 27.4                            |
| 2       | -16.5    | 31.5                       | 29.0                            |
| 3       | -19.3    | 30.9                       | 29.4                            |
| Average | -17.0    | 30.9                       | 28.6                            |

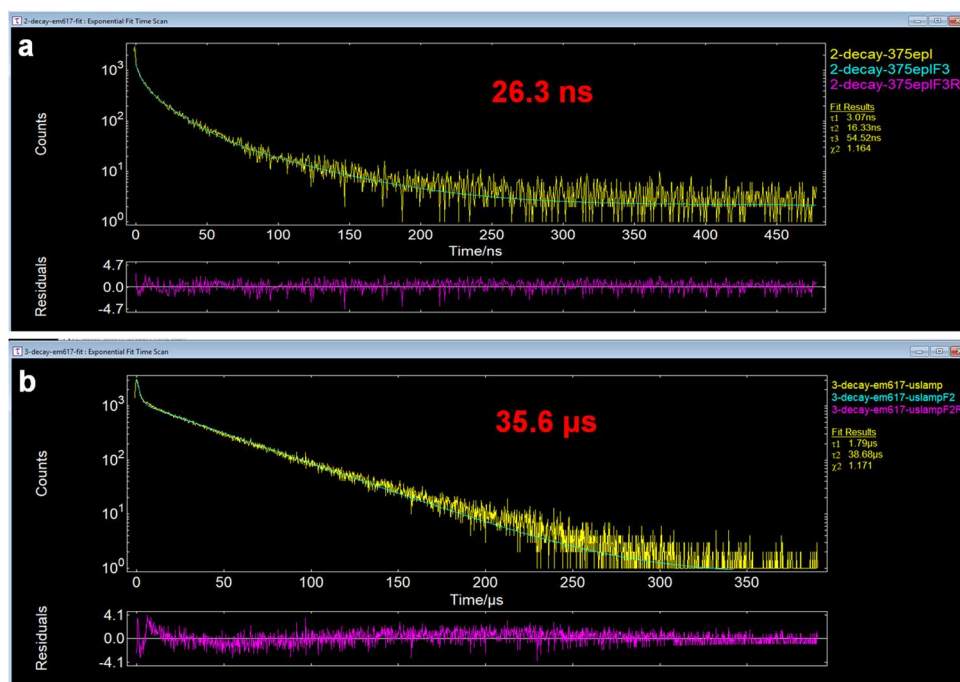

Figure S2. The lifetime of CdTe QDs-Eu<sup>3+</sup> and CdTe QDs-Eu<sup>3+</sup>-OTC at 617 nm.

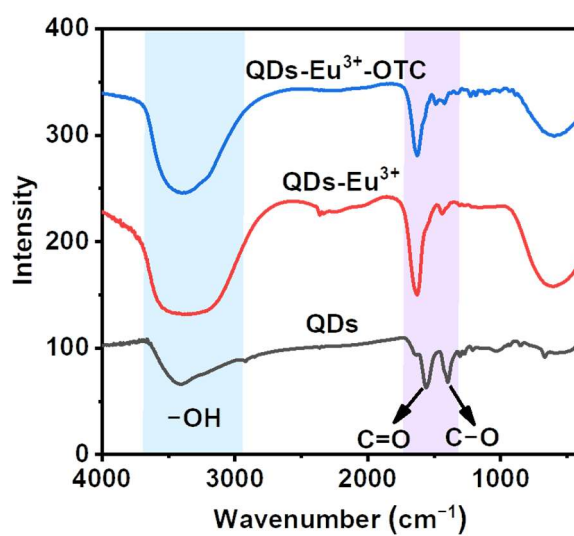

Figure S3. The FTIR spectra of CdTe QDs, CdTe QDs-Eu<sup>3+</sup>, and CdTe QDs-Eu<sup>3+</sup>-OTC.

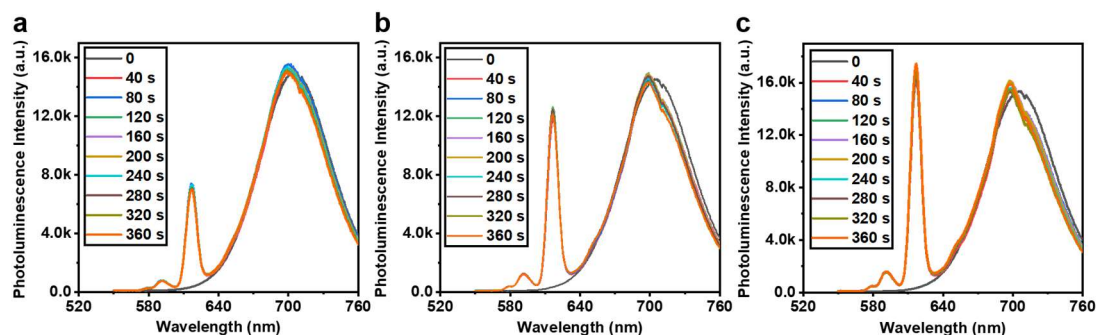

Figure S4. The fluorescence spectra of probe for OTC detection at different concentration of OTC at 3  $\mu\text{M}$  (a), 5  $\mu\text{M}$  (b), and 8  $\mu\text{M}$  (c) with reaction time changing from 0 to 360 s.

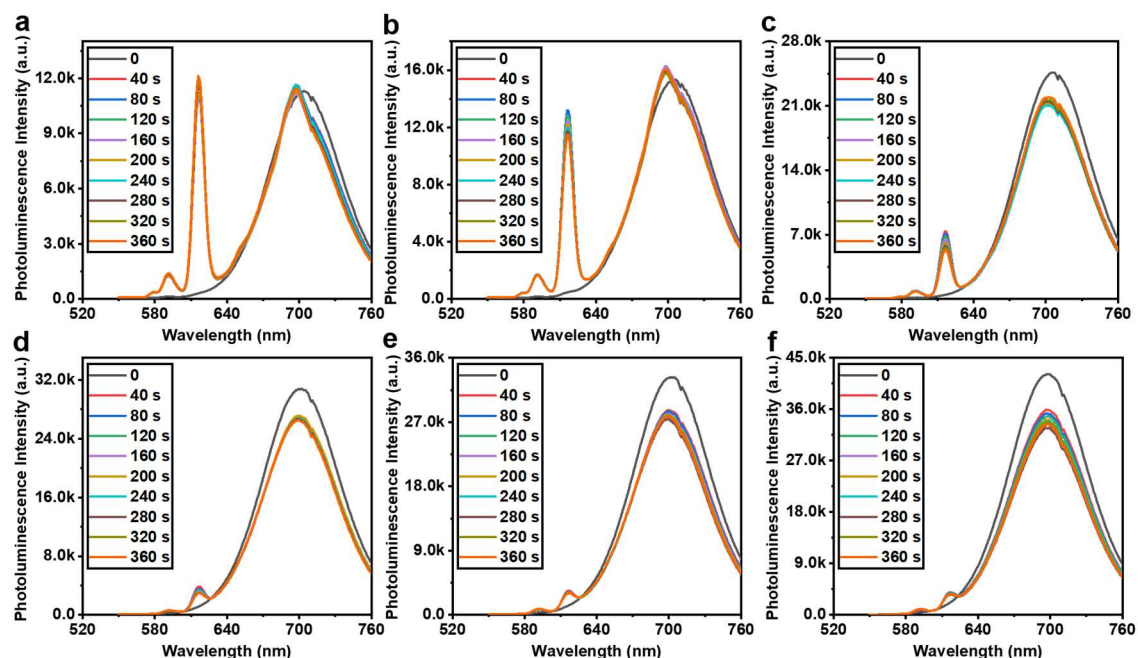

Figure S5. The fluorescence spectra of probe for OTC detection at different pH at 6.8 (a), 7.1 (b), 7.4 (c), 7.7 (d), 8.0 (e), and 8.2 (f) with reaction time changing from (0 to 360) s.
